# Supplementary material
Source: publisher site journal article supplement (https://www.spandidos-publications.com/6282/downloadSupplementary)
Supplement: Supplementary file 1 [file downloadSupplementary]

## Sheet: Sheet1
Table SVII. Correlation between serum exosomes RPL9 and clinicopathological variables in patients with hepatocellular carcinoma.
	RPL9 Elisa results
characteristics	Number of cases (%)	High	Low	p-value
Age (y)
≥55	26(51.0)	6	20	0.113
<55	25(49.0)	11	14
Sex
Male	44(86.3)	14	30	0.886
Female	7(13.7)	3	4
Hepatitis B
Yes	41(80.4)	16	25	0.17
No	10(19.6)	1	9
Cirrhosis
Yes	23(45.1)	6	17	0.32
No	28(54.9)	11	17
AFP (ng/ml)
≥400	22(43.1)	10	12	0.11
<400	29(56.9)	7	22
ALT (U/L)
≥50	18(35.3)	8	10	0.214
<50	33(64.7)	9	24
AST (U/L)
≥40	31(60.8)	13	18	0.105
<40	20(39.2)	4	16
GGT (U/L)
≥50	32(62.7)	12	20	0.413
<50	19(37.3)	5	14
Albumin (g/L)
≥35	42(82.4)	12	30	0.242
<35	9(17.6)	5	4
T-Bil (μmol/L)
≥20	11(21.6)	3	8	0.63
<20	40(78.4)	14	26
Number of lesions
More than one	27(52.9)	9	18	1
Only one	24(47.1)	8	16
Pathologic differentiation
Low differentiated	23(45.1)	10	13	0.164
High-moderate differentiated	28(54.9)	7	21
Tumor sizes (cm)
≥5	27(52.9)	12	15	0.074
<5	24(47.1)	5	19
Location
Right lobe	35(68.6)	10	25	0.286
Not right lobe	16(31.4)	7	9
Completion of capsula
Yes	14(27.5)	3	11	0.437
No	37(72.5)	14	23
Positive margin
Yes	45(88.2)	2	4	1
No	6(11.8)	15	30
TNM stage
Ⅰ~Ⅱ	30(58.8)	9	21	0.546
Ⅲ~Ⅳ	21(41.2)	8	13
PVTT
Yes	28(54.9)	12	16	0.111
No	23(45.1)	5	18
Lymph node metastasis
Yes	4(7.8)	2	2	0.854
No	47(92.2)	15	32
AFP, alpha fetoprotein; ALT, alanine aminotransferase; AST, aspartate aminotransferase; GGT, γ-glutamyl transpeptidase; T-Bil, total bilirubin; PVTT, portal vein tumor thrombus.
51 cases of HCC were analyzed. The content of RPL9 in serum exosomes was detected. According to the ROC curve, the optimal cut-off value of 811.3053 was selected as the dividing point to distinguish the cases with low RPL9 and high RPL9.
